# Supplementary figures and images for: Solvent-assisted crystallization of two-dimensional Ruddlesden–Popper perovskite
Source: Royal Society of Chemistry journal article supplement (doi:10.1039/d1cc03493f), 2021-01-01

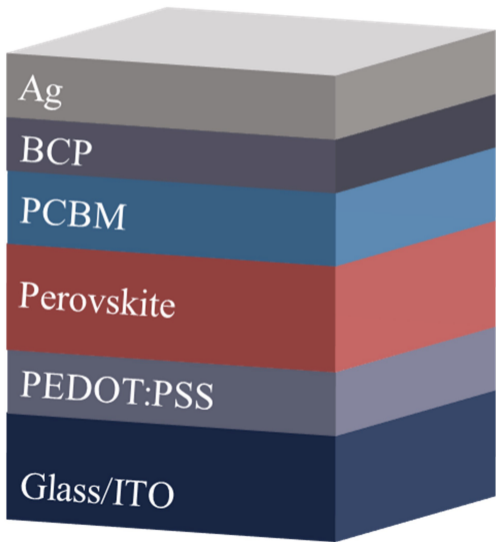

Supplement: d1cc03493f2.pdf [file d1cc03493f2.pdf]

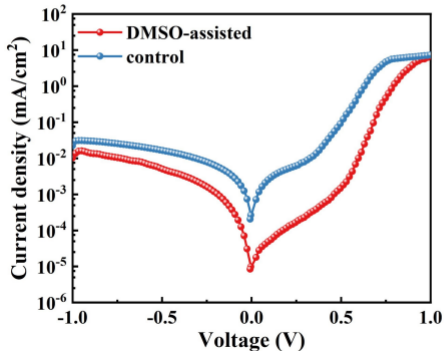

Supplement: d1cc03493f3.pdf [file d1cc03493f3.pdf]

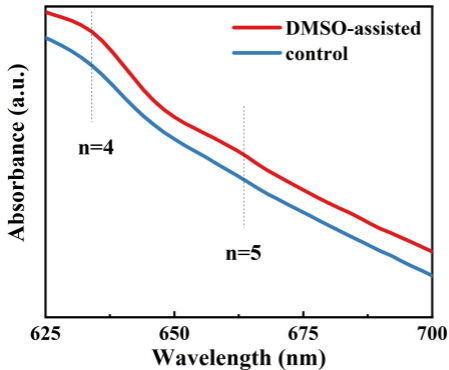

Supplement: d1cc03493f4.pdf [file d1cc03493f4.pdf]

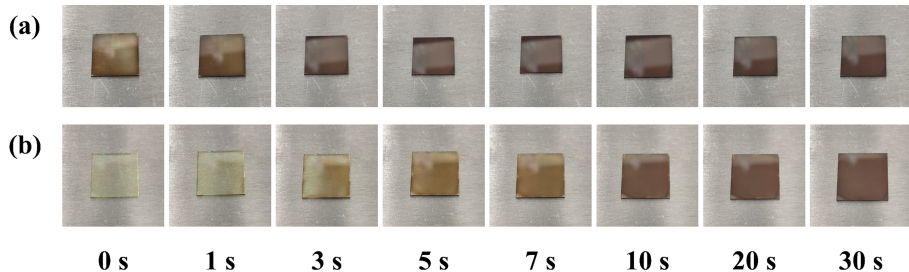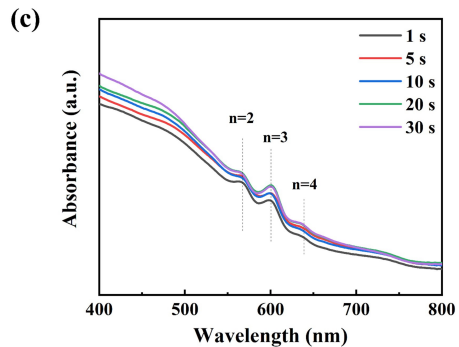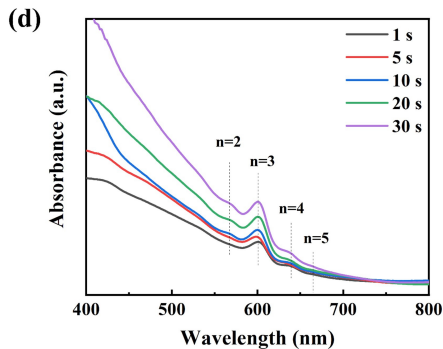

Supplement: d1cc03493f5.pdf [file d1cc03493f5.pdf]

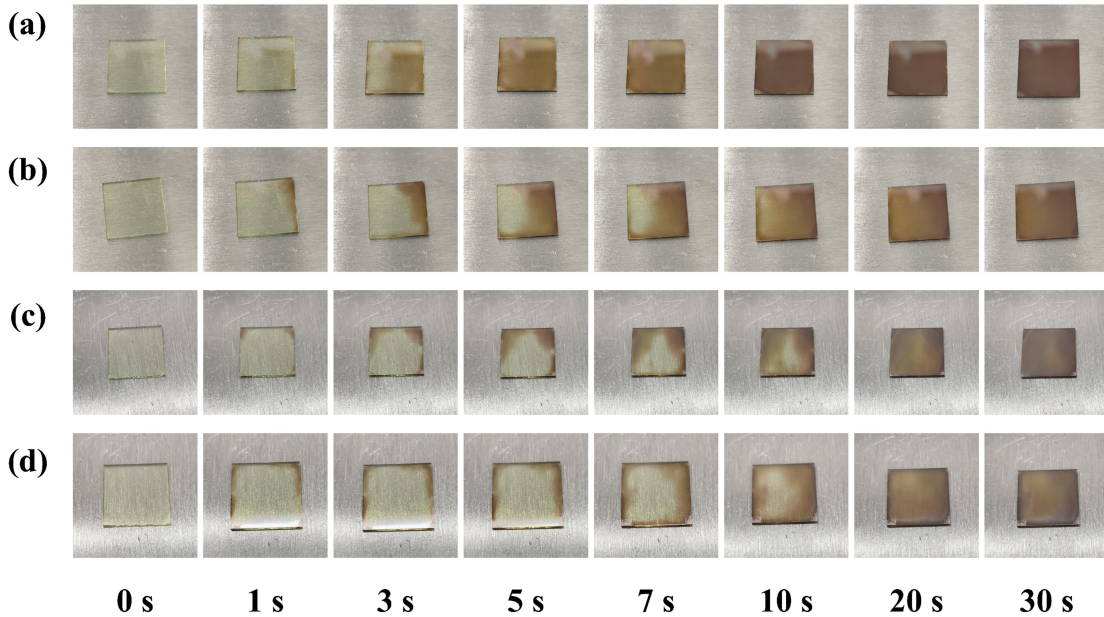

Supplement: d1cc03493f6.pdf [file d1cc03493f6.pdf]

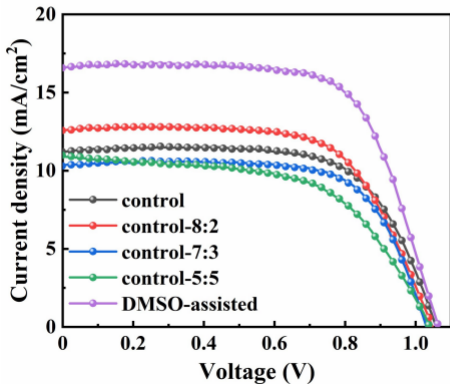

Supplement: d1cc03493f7.pdf [file d1cc03493f7.pdf]
